# Supplementary material for: Improving charge transport by the ultrathin QDs interlayer in polymer solar cells
Source: Royal Society of Chemistry journal article supplement (doi:10.1039/c8ra02770f), 2018-01-01
Supplement: c8ra02770f1.pdf [file c8ra02770f1.pdf]

## Supporting Information

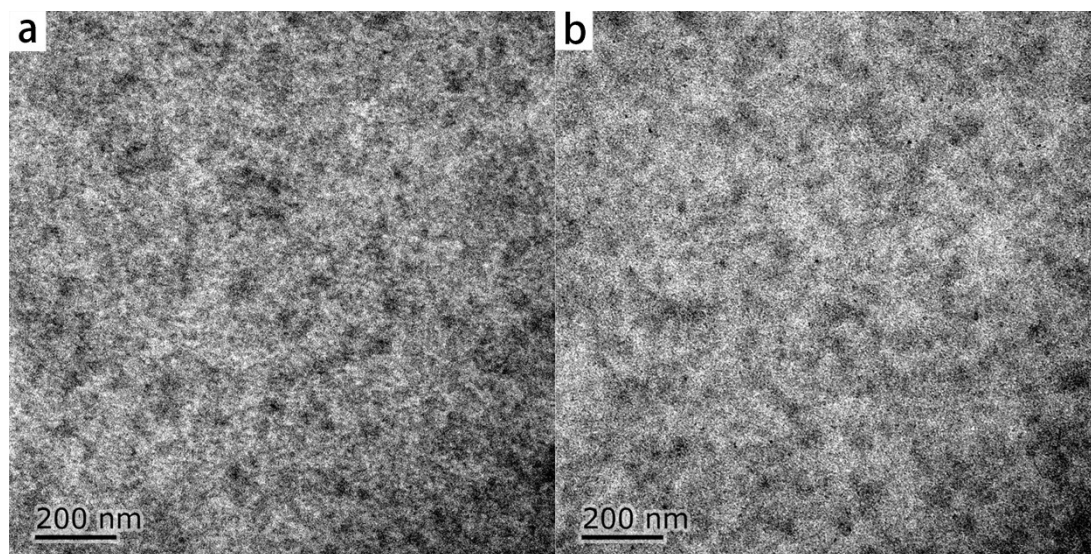

**Figure S1** TEM images of PTB7:PC<sub>71</sub>BM blend films (a) without PbS QDs doped, (b) with 5% PbS QDs doped.

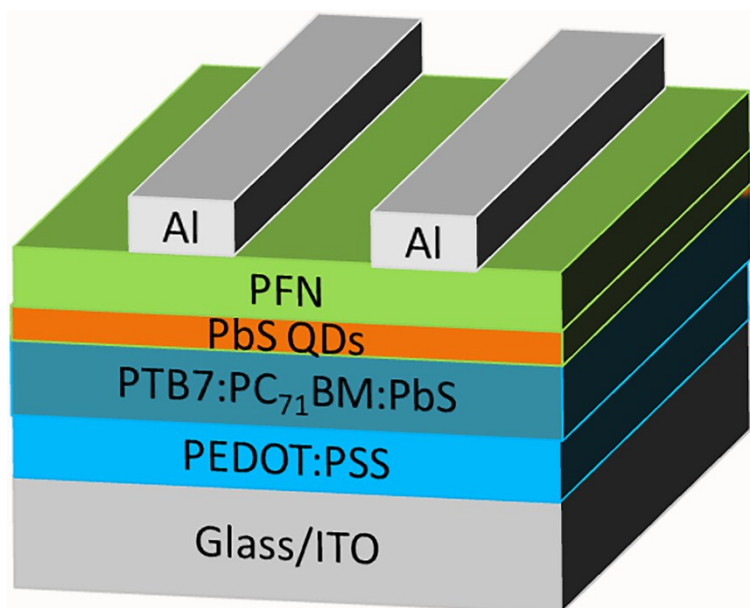

**Figure S2** Schematic image of polymer BHJ solar cells device with structure of ITO/PEDOT:PSS/PTB7:PC<sub>71</sub>BM/PbS QDs/Al.
